# Supplementary material
Source: publisher figshare collection journal article supplement (https://acs.figshare.com/ndownloader/files/7935175)

# Supporting Information

Whole community metagenomics in two different anammox configurations:  
process performance and community structure

*Ananda S. Bhattacharjee<sup>1¶</sup>, Sha Wu<sup>1¶</sup>, Christopher E Lawson<sup>2</sup>, Mike SM Jetten<sup>3</sup>, Vikram Kapoor<sup>4</sup>, Jorge W. Santo Domingo<sup>5</sup>, Katherine D. McMahon<sup>2,6</sup>, Daniel R. Noguera<sup>2</sup> and Ramesh Goel<sup>1\*</sup>*

<sup>1</sup>Department of Civil and Environmental Engineering, University of Utah, Salt Lake City, UT 84112

<sup>2</sup>Department of Civil and Environmental Engineering, University of Wisconsin – Madison, 1415

Engineering Drive, Madison, WI 53706, USA

<sup>3</sup>Department of Microbiology, Radboud University, Nijmegen, The Netherlands.

<sup>4</sup>Department of Civil and Environmental Engineering, University of Texas at San Antonio, One UTSA  
Circle, San Antonio, TX 78249

<sup>5</sup>U.S. Environmental Protection Agency, Office of Research and Development, National Risk  
Management Research Laboratory, Cincinnati, Ohio 45268

<sup>6</sup>Department of Bacteriology, University of Wisconsin – Madison

\* Corresponding author: Ph: 801-581-6110; [ram.goel@utah.edu](mailto:ram.goel@utah.edu)

<sup>¶</sup>Equal contribution by authors

## Contents:

Table S1: Summarizes the MG-RAST analysis results for SGR and AGR metagenome datasets.

Table S2 (a): Lists the anammox metabolism genes in *Ca' Brocadia* sp 1

Table S2 (b): Lists the anammox metabolism genes in *Ca' Brocadia* sp 2

Figure S1: Schematic diagram of two-stages suspended (a) and attached (b) anammox reactors.

Figure S2: Nitrogen concentration ( $\text{NH}_4^+\text{-N}$ ,  $\text{NO}_2^-\text{-N}$ ,  $\text{NO}_3^-\text{-N}$ ) in influent and effluent and the removal efficiency for partial nitrification in (a) suspended growth and (b) attached growth reactor.

Figure S3: Rarefaction curve of annotated species as a function of percentage of reads.

Figure S4: Taxonomic classification based on 16S rRNA gene sequences. Total of clustered 3,140 and 3,416 reads from SGR and AGR genome were attributed to 16S rRNA gene sequences, and assigned to 20 and 16 different phyla for SGR and AGR, respectively. Each slice represents the fraction of the total reads which was assigned to specific phylum. Three digits fractions in % for SGR and AGR were presented after each label in parentheses.

49 Table S1. Summarizes the MG-RAST analysis results for SGR and AGR datasets.

| MG-RAST analysis                                           | SGR              | AGR               |
|------------------------------------------------------------|------------------|-------------------|
| Total reads                                                | 8,247,168        | 8,865,646         |
| Total reads uploaded                                       | 6,504,924        | 7,137,843         |
| QC* passed reads (rRNA genes)                              | 309,473 (4.8%)   | 387,548(5.4%)     |
| QC* passed reads (predicted protein with known function)   | 3,589,563(55.2%) | 4,102,652(57.5%)  |
| QC* passed reads (predicted protein with unknown function) | 319,664(4.9%)    | 463,456(6.5%)     |
| QC* failed reads                                           | 2,286,224(35.1%) | 2,184,187 (30.6%) |

50 \*Minimum complexity reads are placed under this node

51

52

53

54

55

56

57

58

59

60

61

62

63 Table S2(a). Lists the anammox metabolism genes in *Ca' Brocadia* sp 1

| Locus tag    | Start | End   | Product                                |
|--------------|-------|-------|----------------------------------------|
| BROC1_16_6   | 7622  | 9295  | hydrazine oxidoreductase <i>HzoA</i>   |
| BROC1_16_1   | 1123  | 2430  | hydrazine synthase A subunit           |
| BROC1_16_0   | 2     | 1069  | hydrazine synthase A subunit           |
| BROC1_16_2   | 2844  | 4451  | hydroxylamine oxidoreductase           |
| BROC1_16_3   | 4608  | 5057  | hydroxylamine oxidoreductase           |
| BROC1_19_8   | 8832  | 9890  | putative copper-type nitrite reductase |
| BROC1_19_7   | 8171  | 8866  | putative copper-type nitrite reductase |
| BROC1_19_19  | 20642 | 23158 | hydroxylamine oxidoreductase           |
| BROC1_31_12  | 14619 | 15833 | nitrite transporter protein            |
| BROC1_36_18  | 19076 | 19441 | hydrazine oxidoreductase <i>HzoA</i>   |
| BROC1_51_10  | 7925  | 9601  | hydrazine oxidoreductase <i>HzoA</i>   |
| BROC1_52_15  | 20774 | 22075 | hydrazine synthase A subunit           |
| BROC1_52_16  | 22135 | 23202 | hydrazine synthase A subunit           |
| BROC1_60_8   | 9676  | 10575 | nitrite/formate transporter            |
| BROC1_60_7   | 8740  | 9660  | nitrite/formate transporter            |
| BROC1_85_18  | 14551 | 16797 | hydroxylamine oxidoreductase           |
| BROC1_85_17  | 13844 | 14605 | hydroxylamine oxidoreductase           |
| BROC1_98_6   | 6102  | 7349  | hydroxylamine oxidoreductase           |
| BROC1_98_20  | 23248 | 26652 | hydroxylamine oxidoreductase           |
| BROC1_98_6   | 6102  | 7349  | hydroxylamine oxidoreductase           |
| BROC1_98_6   | 6102  | 7349  | hydroxylamine oxidoreductase           |
| BROC1_98_20  | 20088 | 21698 | hydroxylamine oxidoreductase           |
| BROC1_98_7   | 7447  | 8298  | hydroxylamine oxidoreductase           |
| BROC1_153_15 | 19206 | 20336 | hydrazine synthase C subunit           |
| BROC1_153_16 | 20441 | 21280 | hydrazine synthase B subunit           |
| BROC1_154_40 | 35440 | 36456 | hydrazine synthase B subunit           |
| BROC1_154_41 | 36777 | 37061 | hydrazine synthase C subunit           |
| BROC1_164_58 | 55475 | 56839 | ammonium transporter                   |
| BROC1_164_56 | 53441 | 54991 | ammonium transporter                   |
| BROC1_164_10 | 10412 | 12088 | hydroxylamine oxidoreductase           |
| BROC1_181_33 | 38589 | 39854 | hydroxylamine oxidoreductase           |
| BROC1_182_18 | 10227 | 11141 | nitrite/formate transporter            |
| BROC1_191_89 | 86579 | 87955 | hydroxylamine oxidoreductase           |
| BROC1_191_87 | 85674 | 86180 | hydroxylamine oxidoreductase           |

64

65

66

67 Table S2(b). Lists the anammox metabolism genes in *Ca' Brocadia* sp 2

| Locus tag   | Start  | End    | Product                              |
|-------------|--------|--------|--------------------------------------|
| BROC2_0_181 | 224779 | 226428 | hydroxylamine oxidoreductase         |
| BROC2_0_26  | 26549  | 28006  | hydroxylamine oxidoreductase         |
| BROC2_2_180 | 201636 | 203381 | hydroxylamine oxidoreductase         |
| BROC2_3_105 | 118501 | 120111 | hydroxylamine oxidoreductase         |
| BROC2_4_0   | 66     | 1196   | hydrazine synthase C subunit         |
| BROC2_10_0  | 1      | 609    | hydrazine oxidoreductase <i>HzoA</i> |
| BROC2_10_50 | 58979  | 60514  | hydroxylamine oxidoreductase         |
| BROC2_11_0  | 3      | 1349   | hydrazine synthase A subunit         |
| BROC2_13_19 | 24974  | 26188  | nitrite transporter protein          |
| BROC2_18_66 | 58438  | 59568  | hydrazine synthase C subunit         |
| BROC2_19_23 | 24132  | 25556  | ammonium transporter                 |
| BROC2_20_0  | 1      | 1395   | hydrazine oxidoreductase <i>HzoA</i> |
| BROC2_23_0  | 1      | 654    | hydrazine oxidoreductase <i>HzoA</i> |
| BROC2_32_4  | 5957   | 7303   | hydrazine synthase A subunit         |
| BROC2_32_0  | 1      | 1395   | hydrazine oxidoreductase <i>HzoA</i> |
| BROC2_32_3  | 3947   | 5554   | hydroxylamine oxidoreductase         |

68  
69  
70  
71  
72  
73  
74  
75  
76  
77  
78  
79  
80

Figure S1. Schematic diagram of two-stages suspended (a) and attached (b) anammox reactors.

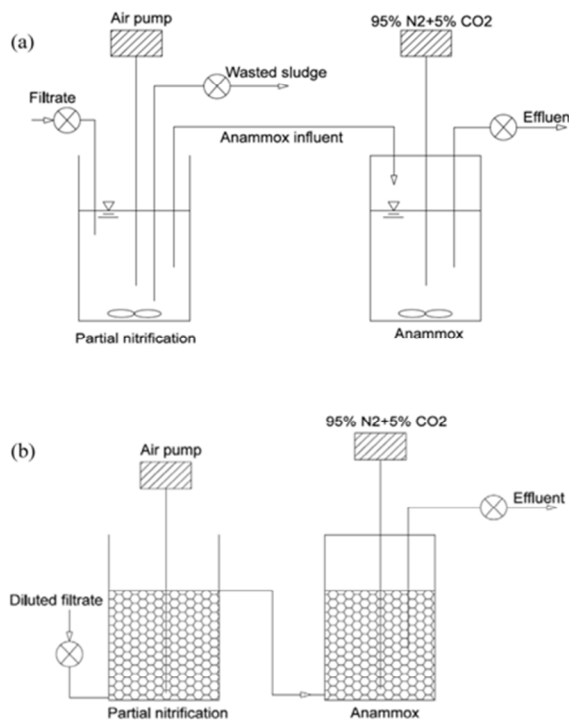

Figure S2. Nitrogen concentration ( $\text{NH}_4^+\text{-N}$ ,  $\text{NO}_2^-\text{-N}$ ,  $\text{NO}_3^-\text{-N}$ ) in influent and effluent and the removal efficiency for partial nitritation in (a) suspended growth and (b) attached growth reactor.

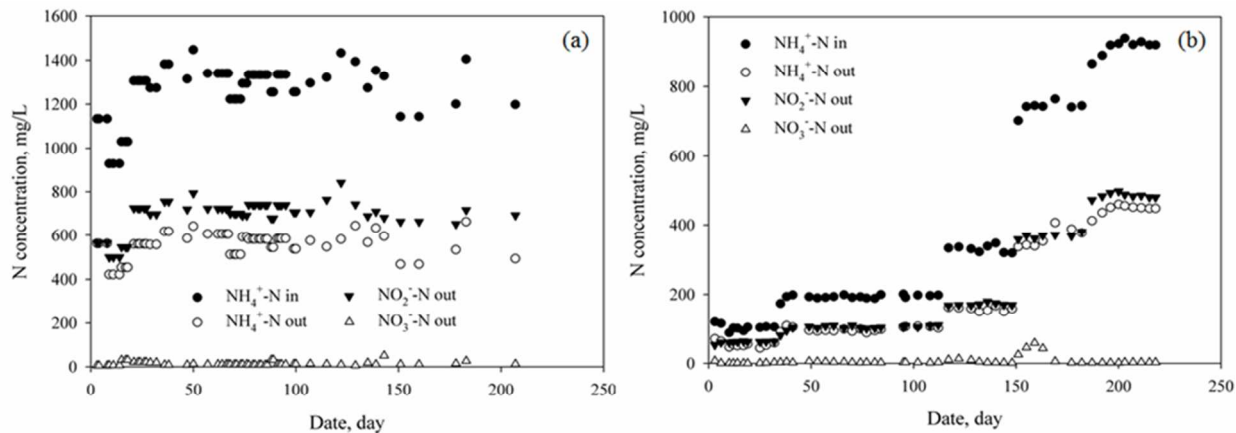

89     Figure S3. Rarefaction curve of annotated species as a function of percentage of reads.

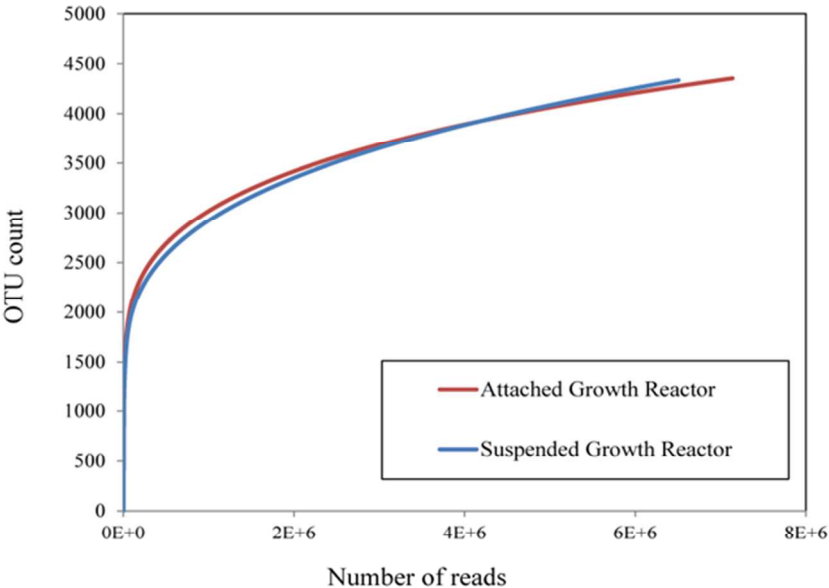

Figure S4. Taxonomic classification based on 16S rRNA gene sequences. Total of clustered 3,140 and 3,416 reads from SGR and AGR genome were attributed to 16S rRNA gene sequences, and assigned to 20 and 16 different phyla for SGR and AGR, respectively. Each slice represents the fraction of the total reads that was assigned to specific phylum. Three digits fractions in % for SGR and AGR were presented after each label in parentheses.

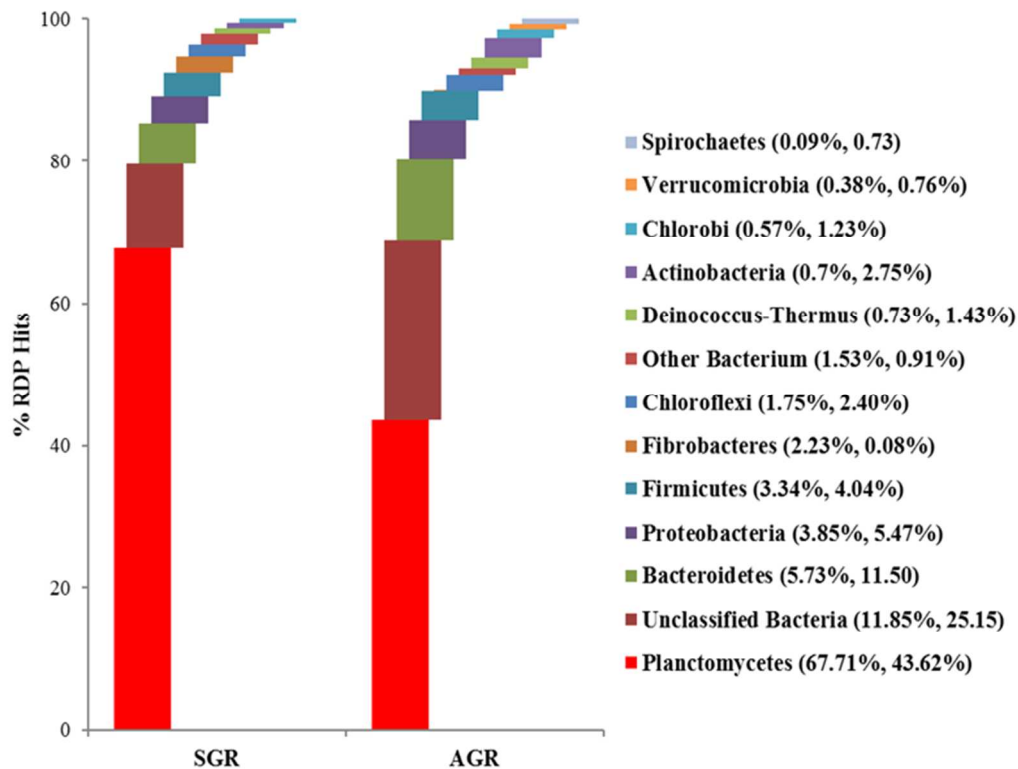

Supplement: Supplementary file 1 [file 7935175]
